# Supplementary material
Source: MDPI journal article supplement (https://www.mdpi.com/2072-4292/13/17/3483)
Supplement: s1 [file s1 › remotesensing-1312739-supplementary.pdf]

# Supplementary Materials: Integration of Remote Sensing Data into a Composite Voxel Model for Environmental Performance Analysis of Terraced Vineyards in Tuscany, Italy

Jakub Tyc, Defne Sunguroğlu Hensel, Erica Isabella Parisi, Grazia Tucci and Michael Ulrich Hensel

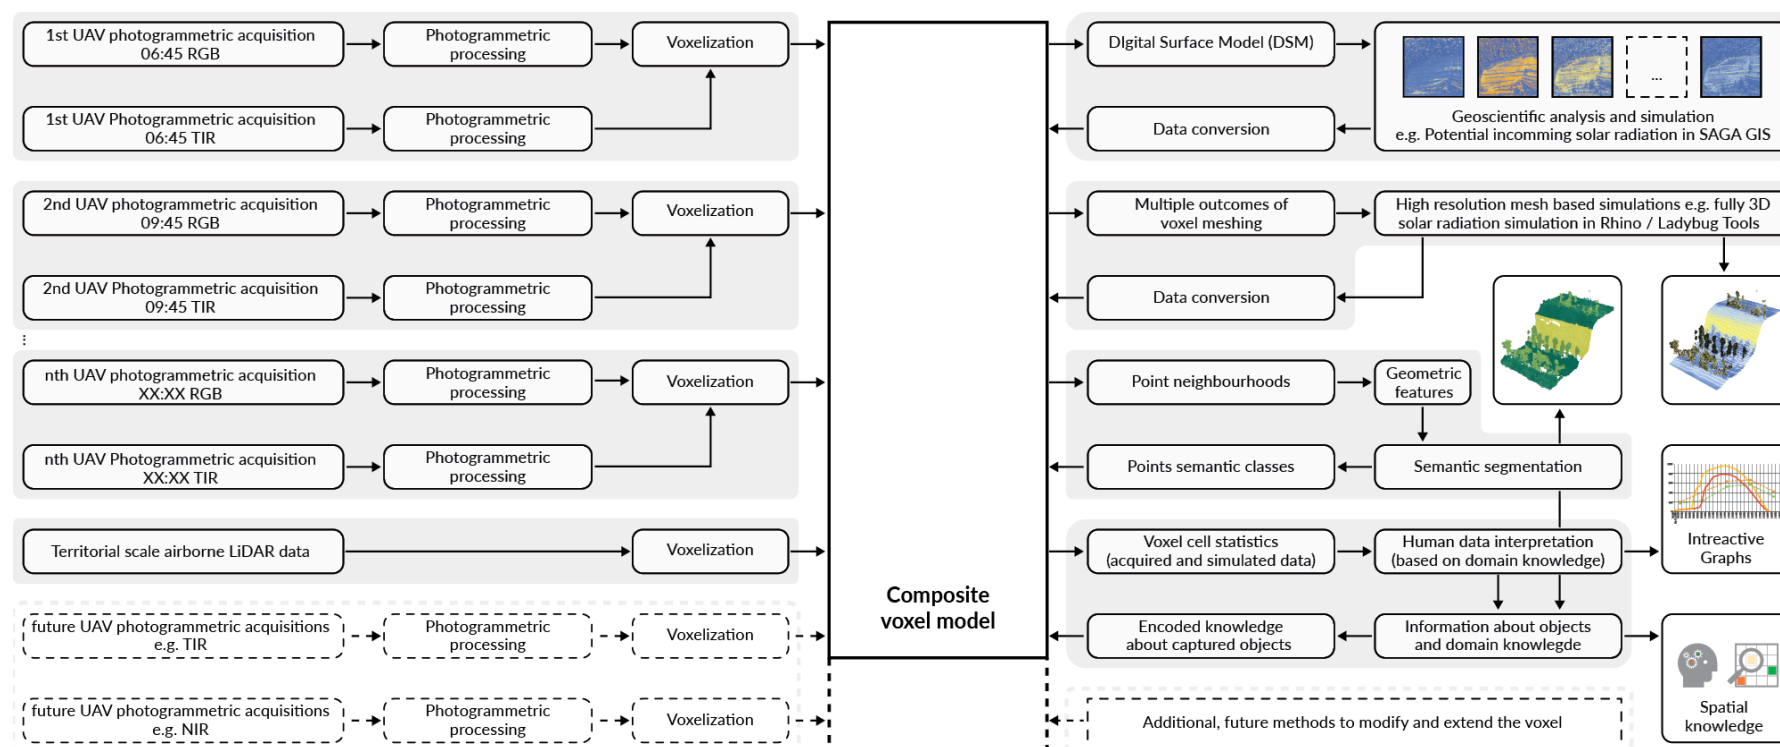

**Figure S1.** Workflow diagram presenting the steps needed to construct the CVM. Left: datasets used to construct the model. Right: interfaces with external simulation tools, as well as data processing and visualisation methods. Analysis and simulation results, such as incoming solar radiation, are fed back to the CVM, thereby creating feedback loops. This is as full page version of Figure 10 presented in the article.

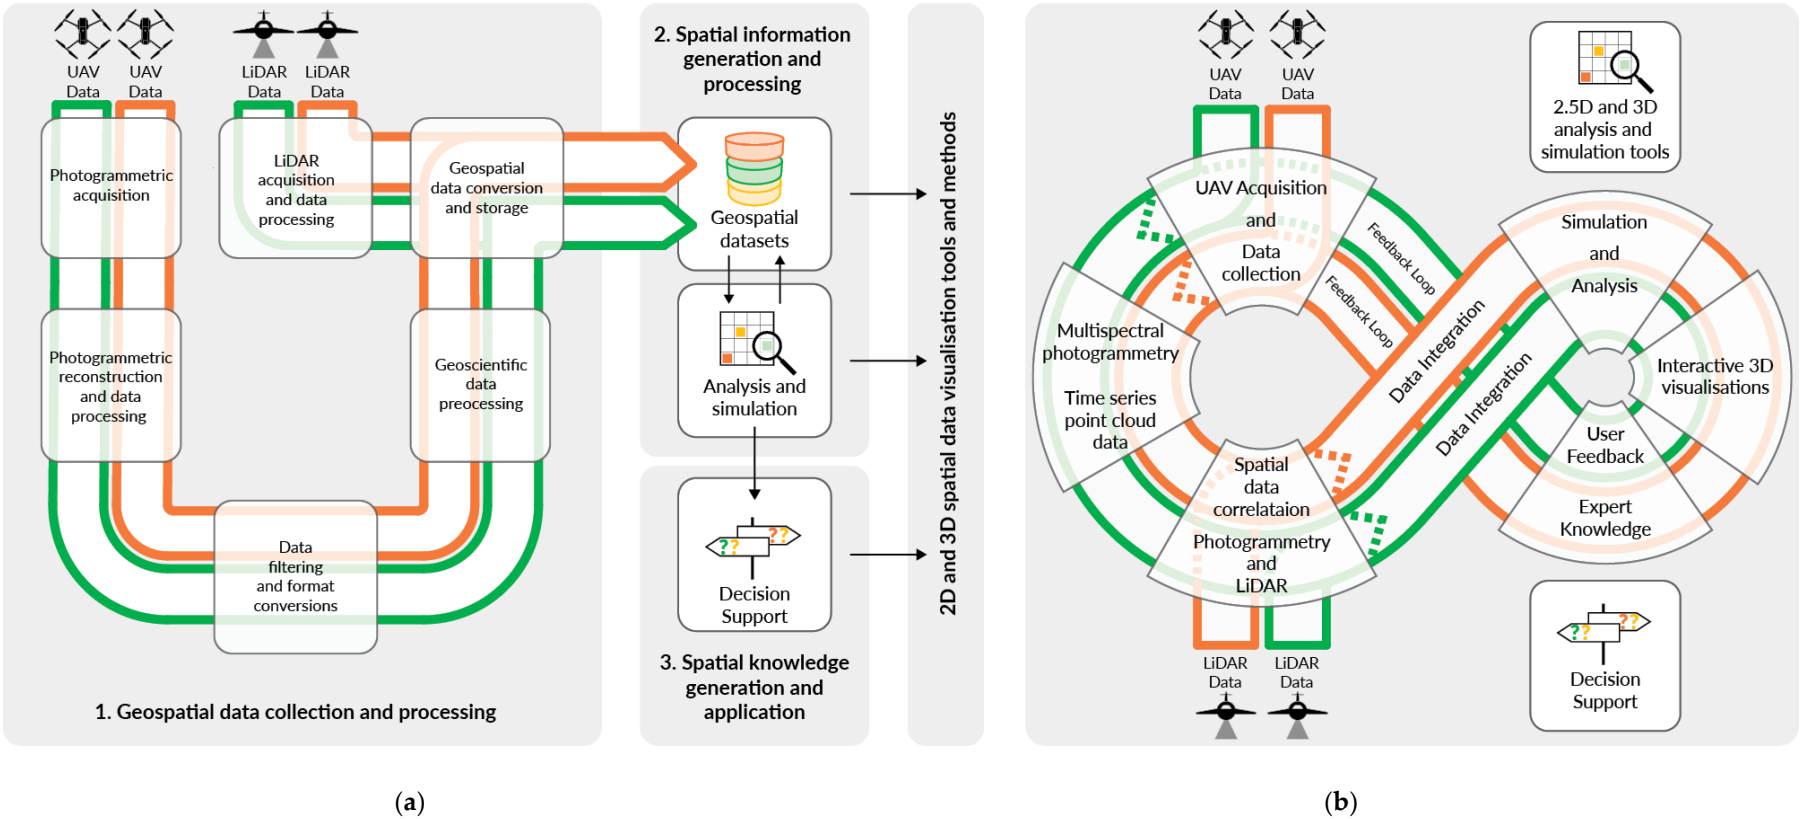

**Figure S2.** Workflows for generating spatial knowledge via (a) a conventional sequential approach and (b) the proposed composite voxel model (CVM)-based approach. This is as full page version of Figure 11 presented in the article.
